# Supplementary material for: Functional maturation of human neural stem cells in a 3D bioengineered brain model enriched with fetal brain-derived matrix
Source: PubMed Central journal article supplement (PMC6884597; doi:10.1038/s41598-019-54248-1), 2019-11-29
Supplement: 41598_2019_54248_MOESM1_ESM.pdf [file 41598_2019_54248_MOESM1_ESM.pdf]

1 **Functional maturation of human neural stem cells in a 3D bioengineered brain model enriched with fetal**  
2 **brain-derived matrix**

3 Disha Sood<sup>1</sup>, Dana M. Cairns<sup>1</sup>, Jayanth M. Dabbi<sup>1</sup>, Charu Ramakrishnan<sup>2</sup>, Karl Deisseroth<sup>2</sup>, Lauren D. Black III<sup>1</sup>,  
4 Sabato Santaniello<sup>3</sup>, David L. Kaplan<sup>1\*</sup>

5

6

## 7 **Supplementary Methods**

### 8 **Viability Assay**

9 Cell proliferation reagent WST-1 assay (Sigma-Aldrich) was performed at end time points before freezing  
10 the samples for PCR, according to the instructions provided by the manufacturer, to assess overall cell viability  
11 across different ECM conditions. Briefly, the samples were incubated for 1 h with WST-1 reagent diluted 1:10 (v:v)  
12 in culture medium, followed by a reading of the medium absorbance with plate reader (Molecular Devices) at 450  
13 and 600 nm as the reference wavelength. Fresh medium was used as a baseline control and its average  
14 absorbance was subtracted from the value of the samples.

### 15 **Lactate Dehydrogenase Assay**

16 Lactate dehydrogenase (LDH) enzyme released into media by the ruptured cells, was used as a  
17 measure of cell death at different time points during the 3D culture without having to sacrifice the samples. LDH  
18 assay was performed according to the manufacturer instructions (Sigma-Aldrich). Briefly, culture medium was  
19 mixed with the assay reagents in a 1:2 ratio. Following 30 mins incubation at room temperature, the reaction was  
20 stopped by addition of 1N HCl. The absorbance readings were measured at 490 nm and 690 nm as the reference  
21 wavelengths. Fresh medium without any construct was used as a baseline control and its average was subtracted  
22 from the sample values.

### 23 **CSPG Release ELISA**

24 CSPGs released by the differentiating hiNSCs in media were measured using an ELISA based assay.  
25 Media samples from the 3D constructs were incubated overnight at 4°C in a 96-well immuno plate (Thermo  
26 Fischer Scientific). Alongside the sample media incubation, chicken extracellular CSPGs (Millipore) were used  
27 over a range of serial dilutions for the generation of standard curves. Following washes with PBS-tween,  
28 monoclonal anti-chondroitin sulfate antibody produced in mouse/clone CS-56, ascites fluid (Sigma) was added for  
29 overnight incubation at 4°C. After the next round of washes, HRP conjugated goat anti-mouse secondary antibody  
30 (Abcam) was incubated at room temperature for 2 h. TMB (3,3',5,5'-tetramethylbenzidine) 1-C Substrate (Fisher  
31 Scientific) was introduced following the last round of washes with PBS-Tween. Finally, after the color developed  
32 for 10 mins at room temperature, the reaction was stopped with 1N HCl. The absorbance readings were

33 measured at 450 nm wavelength and the fresh media readings were subtracted from the sample readings. The  
34 standard curve was utilized for calculating the quantities of CSPGs released in the different conditions and  
35 reported in pg/ml.

## 36 **qRT-PCR**

37 Samples were flash frozen in liquid nitrogen and stored in -80oC in individual Eppendorf tubes until RNA  
38 extraction was performed. All samples were placed on dry ice during extraction, sequentially disrupted using a  
39 liquid nitrogen chilled bio-pulverizer. Between each sample, the pulverizer was wiped with 70% ethanol to remove  
40 remnants of the previous sample, and between each sample set (different tumor types), all the tools were cleaned  
41 with RNAzap. Lysis buffer was immediately added to the powdered frozen sample and placed on ice. Once all the  
42 samples were in lysis buffer on ice, a 22 gauge needle and syringe was used for sample homogenization one by  
43 one using a fresh needle and syringe every time. All the samples were spun down to remove undigested material  
44 (mainly silk scaffold) and the supernatant was transferred to clean RNase free-Eppendorfs. Following this, the  
45 SurePrep All Prep kit (Fisher Scientific) protocol was followed until RNA was eluted from the columns. RNA  
46 concentrations were measured using nanodrop 2000 (Thermo Fisher Scientific). RT2 First Strand Kit with an  
47 incorporated gDNA removal step with buffer GE (Qiagen) was utilized for cDNA synthesis from the eluted RNA.  
48 cDNA samples were mixed with RT<sup>2</sup> SYBR Green Fluor qPCR Mastermix and added to the Qiagen Custom RT2  
49 PCR Array (including a housekeeping gene, genomic DNA control and RT control). PCR was run on BioRad  
50 CFX96. Table 1 lists the genes that were tested. The primers for all the genes profiled in qPCR were bought from  
51 Qiagen. These sequences were pre-designed and validated by Qiagen.

## 52 **Cytokine Arrays**

53 Multiplex Quantibody cytokine arrays (RayBiotech) were used to semi-quantitatively compare cytokines  
54 (Table 2) released by differentiating hiNSCs cultured in the 3D bioengineered brain model with different ECM  
55 components. Small volumes of control media samples/cell culture supernatants (50µl) from the 3D constructs  
56 were incubated in the capture antibody spotted glass slides or the membranes, along with the standards provided  
57 that corresponded to known concentrations of the targets for the Quantibody arrays. This overnight incubation  
58 was followed by another overnight step at 4°C, involving the biotinylated detection antibody cocktail. Next,  
59 streptavidin-conjugated fluorophore or HRP-streptavidin was added for 1 h at room temperature. Finally, the slide

60 was disassembled from the removable gasket, dried and scanned using a fluorescence microarray laser scanner  
 61 (Ray Biotech). Protein expression profiles of the differentiating hiNSCs across the varying ECM conditions were  
 62 quantified using the Q-analyzer software (Ray Biotech). Table 2 lists the cytokines that were tested.

### 63 **Calcium Imaging Cluster Analysis**

64 Each  $\Delta F/F$  was processed to compute the following features, which collectively provide a time-  
 65 frequency characterization that is unique to the  $\Delta F/F$  signal:

66 1) Line-length:  $f_1 = \frac{1}{N} \sum_{k=1}^{N-1} |\Delta F / F(k+1) - \Delta F / F(k)|;$

67 2) Standard Deviation:  $f_2 = \frac{1}{N} \sqrt{\sum_{k=1}^N (\Delta F / F(k) - \mu)^2};$

68 3) Entropy:  $f_3 = -\sum_n p_n \log_2 p_n;$

69 4) Spectral peak:  $f_4 = \arg \max_{\omega} P_{\Delta F/F}(\omega);$

70 5) Spectral centroid:  $f_5 = \frac{\int \omega P_{\Delta F/F}(\omega) d\omega}{\int P_{\Delta F/F}(\omega) d\omega};$

71 6) Energy:  $f_6 = \sum_{k=1}^N (\Delta F / F(k))^2;$

72 7) Global/local peak ratio:  $f_7 = \frac{g^*}{\sum_{g_i \in G, g_i < g^*} \frac{g_i}{J-1}},$

73 where  $\Delta F/F(k)$  is the  $k$ -th sample in the  $\Delta F/F$  time series,  $N$  is the total number of samples in  $\Delta F/F$ ,  $\mu$  is the  
 74 average value of  $\Delta F/F$ , and  $P_{\Delta F/F}(\omega)$  is the power spectrum density of the  $\Delta F/F$  signal at frequency  $0 \leq \omega \leq F_s/2$ ,  
 75 where  $F_s$  is the number of frames per second. To estimate the entropy (3), the sample probability function of the  
 76  $\Delta F/F$  intensity values is computed and the correspondent sample probability values  $p_n$  are used. The spectral  
 77 peak (4), instead, is the frequency  $\omega$  of the maximum power spectrum density value  $P_{\Delta F/F}(\omega)$ . Finally, the peak  
 78 ratio (7) is estimated by computing all the local maxima (i.e., peaks)  $G = [g_1, g_2, g_3, \dots, g_J]$  of the  $\Delta F/F$  signal and  
 79 the absolute maximum (i.e., global peak)  $g^*$  among the peaks in  $G$ . In addition to features (1)-(7), the entropy of  
 80 the squared-normalized Teager Energy vector was computed. Briefly, the Teager Energy series was computed:

81 
$$T(k) = \begin{cases} \Delta F / F(k) - \Delta F / F(k-1) \times \Delta F / F(k+1) & k = 2, 3, \dots, N-1 \\ 0 & \textit{otherwise} \end{cases}$$

82 and the sample entropy is computed as:

83 8) Teager Energy entropy:  $f_8 = -\sum_{k=1}^N S(k) \log_2 S(k)$ ,

84 where  $S(k)$  is the squared and normalized version of  $T(k)$ , i.e.,  $S(k) = T^2(k) / \sum_j T^2(j)$ .

85

86

87 **Supplementary Figures**

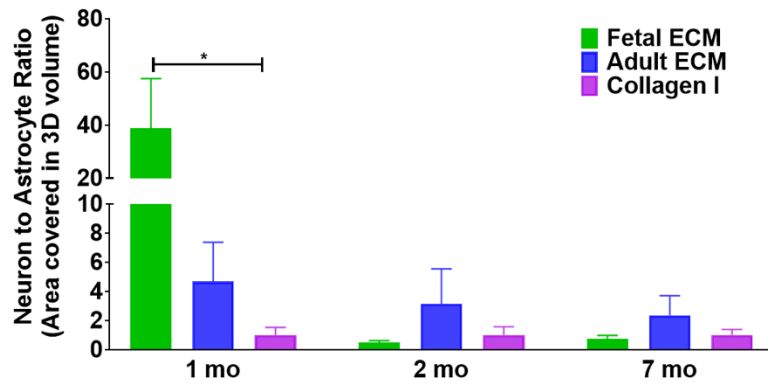

88

89 **Supplementary Figure 1:** Neuron to astrocyte ratio calculated by dividing the total volume in 3D confocal stacks  
90 covered by neurons versus astrocytes post basic image processing. One way ANOVA on log transformed data  
91 with Dunnett's posthoc at each time point,  $p = 0.0344$ ,  $n = 3-6$ .

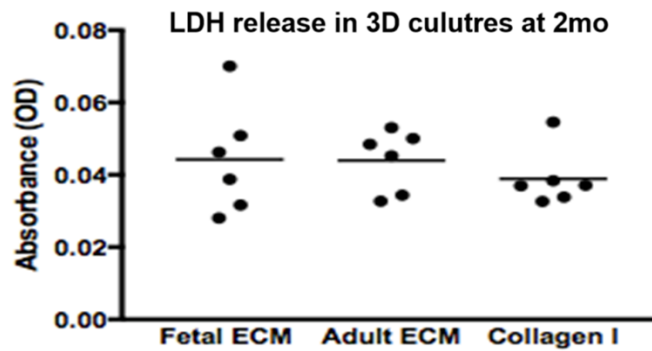

92

93 **Supplementary Figure 2:** Toxicity levels at 2 mo time point in hiNSC 3D cultures as measured by LDH  
94 **release in media.** No statistical difference (One-way ANOVA) in comparison to collagen I when the cells were  
95 grown in the presence of decellularized ECM.

96

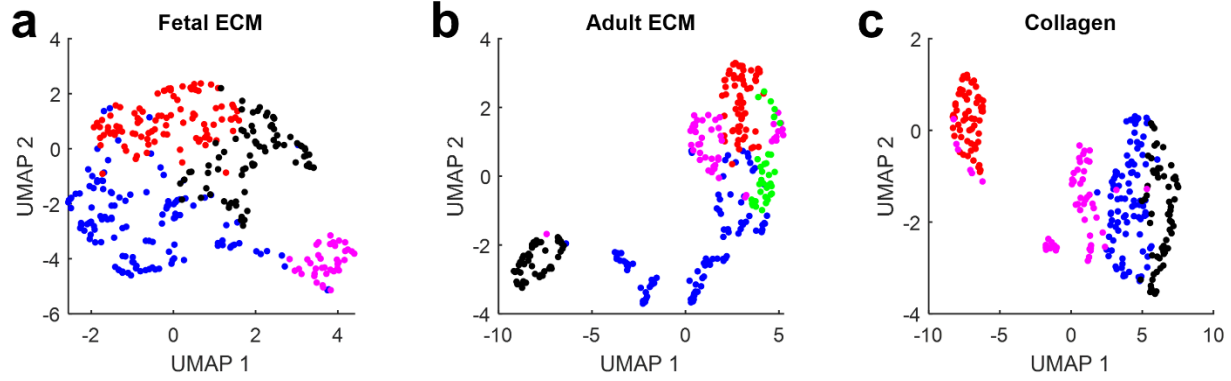

97

98 **Supplementary Figure 3: Cluster Analysis at 3 months.** UMAP plot of the ROIs from fetal ECM (a:  $N=341$ ),  
99 adult ECM (b:  $N=294$ ), and Collagen I (c:  $N=277$ ) constructs at 3 months colored by five clusters. Clustering was  
100 conducted separately for each type of construct ( $n=3$  cultures per type of construct). Cluster ID: 1 = blue dots; 2 =  
101 red dots; 3 = black dots; 4 = magenta dots; 5 = green dots

102

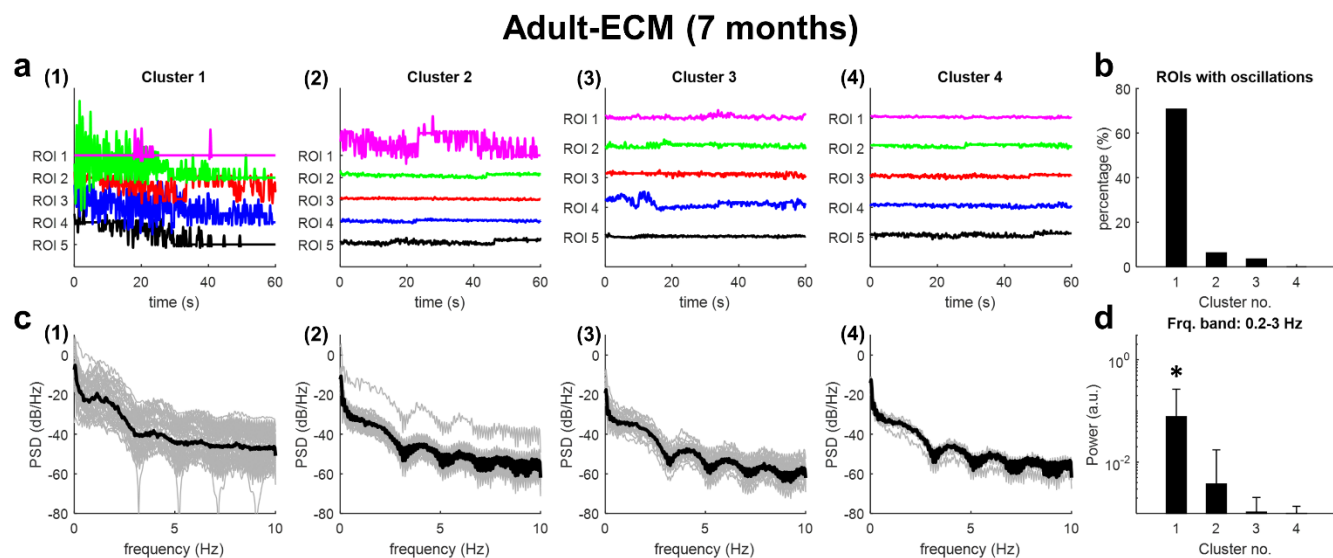

104

105 **Supplementary Figure 4: Calcium activity from clusters in Adult-ECM constructs at 7 months.** For cluster 1

106 through 4, panel a) reports fluorescence signals  $\Delta F/F$  from five sample ROIs from the cluster, while panel c)

107 reports the power spectrum density (PSD) of all ROIs in the cluster (gray lines, one line per ROI) and their median

108 PSD (thick black line). Sub-panels (1), (2), (3), and (4) in a-c) are for cluster 1, 2, 3, and 4, respectively. Number

109 of ROIs per cluster are  $M=41$  (cluster 1), 32 (cluster 2), 29 (cluster 3), and 10 (cluster 4), respectively. Panel b)

110 reports the percentage of ROIs in each cluster whose  $\Delta F/F$  time series exhibit significant oscillations. Panel d)

111 reports the power in the frequency band [0.2, 3] Hz for  $\Delta F/F$  signals in each cluster. Values are mean  $\pm$  S.E.M.

112 across  $M$  ROIs, with  $M$  as in a-c). Asterisks denote significant difference between clusters (one-way ANOVA with

113 Tukey-Kramer *post hoc* test,  $P$ -value  $P < 0.01$ ).



## Collagen-I (7 months)

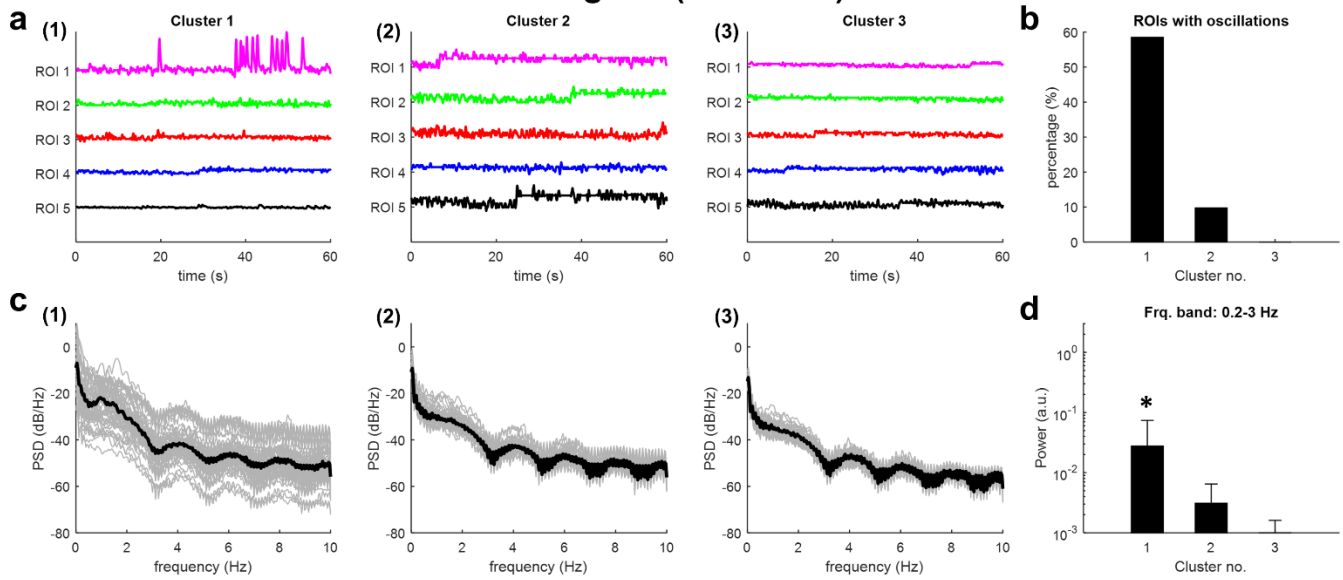

114

115 **Supplementary Figure 5: Calcium activity from clusters in Collagen-I constructs at 7 months.** For cluster 1  
 116 through 3, panel a) reports fluorescence signals  $\Delta F/F$  from five sample ROIs from the cluster, while panel c)  
 117 reports the power spectrum density (PSD) of all ROIs in the cluster (gray lines, one line per ROI) and their median  
 118 PSD (thick black line). Sub-panels (1), (2), and (3) in a)-c) are for cluster 1, 2, and 3, respectively. Number of  
 119 ROIs per cluster are  $M=53$  (cluster 1), 41 (cluster 2), and 26 (cluster 3), respectively. Panel b) reports the  
 120 percentage of ROIs in each cluster whose  $\Delta F/F$  time series exhibit significant oscillations. Panel d) reports the  
 121 power in the frequency band [0.2, 3] Hz for  $\Delta F/F$  signals in each cluster. Values are mean  $\pm$  S.E.M. across  $M$   
 122 ROIs, with  $M$  as in a)-c). Asterisks denote significant difference between clusters (one-way ANOVA with Tukey-  
 123 Kramer *post hoc* test,  $P$ -value  $P<0.001$ ).

124

125

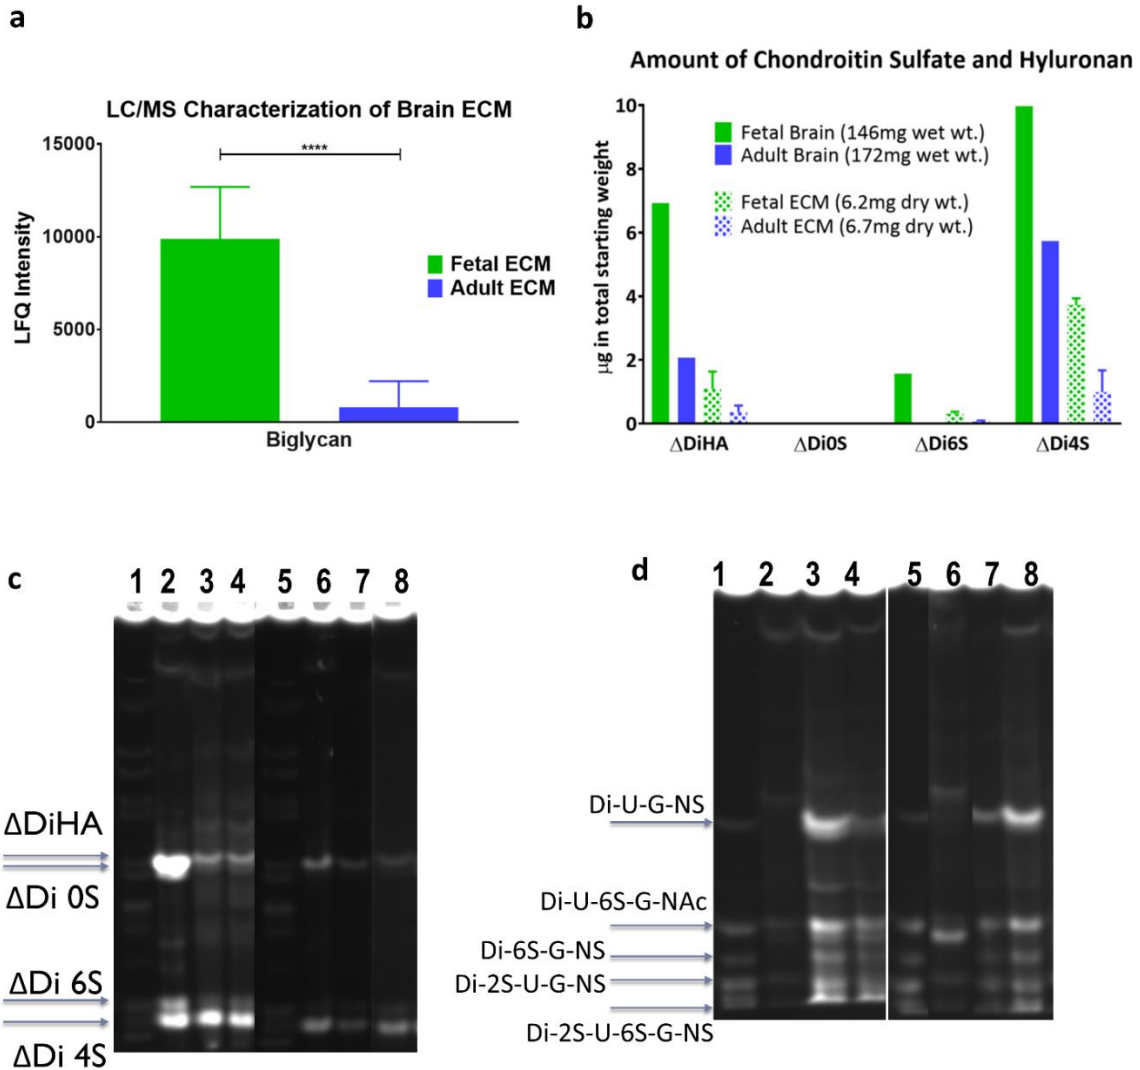

126

127 **Supplementary Figure 6: Characterization of decellularized porcine brain extracellular matrix.** (a) LFQ  
 128 intensities corresponding to biglycan fragments observed in fetal versus adult porcine brain decellularized matrix,  
 129 following LC/MS analysis. Unpaired two-tailed t-test, n=3, p=0.0073. (b) Overall higher quantity of GAGs present  
 130 in fetal brain, with corresponding higher retention in the extracted fetal brain ECM based on FACE analysis. (c)  
 131 Characterization of decellularized fetal & adult brain ECM in comparison to fetal and adult whole brains by FACE.  
 132 Chondroitin sulfate (CS) and hyaluronan (HA) bands in the fetal & adult porcine brain ECM. Lanes 1/5,2,3/4,6,7/8  
 133 correspond to standard, fetal brain, fetal ECM, adult brain and adult ECM, respectively. (d) Heparin sulfate (HS)  
 134 bands in the fetal & adult porcine brain ECM over multiple extractions. Abbreviations for HS disaccharides  
 135 standards are as follows:

- 136       • delta DiHS - NS Heparan delta Di – NS:
- 137   2 - deoxy - 2 - sulfamino - 4 - O - (4 - deoxy - alpha - L - threo - hex - 4 -enopyranosyluronic acid) - D - glucose
- 138       • delta DiHS - 6S Heparan delta Di - 6S:
- 139   2 - acetamido - 2 - deoxy - 4 - O - (4 - deoxy - alpha - L - threo - hex - 4 -enopyranosyluronic acid) - 6 - O - sulfo -  
140   D - glucose
- 141       • delta DiHS - diS1 Heparan delta Di - di (6, N) S:
- 142   2 - deoxy - 2 - sulfamino - (4 - deoxy - alpha - L - threo - hex - 4 -enopyranosyluronic acid) - D - glucose
- 143       • delta DiHS - diS2 Heparan delta Di - di (U, N) S:
- 144   2 - deoxy - 2 - sulfamino - (4 - deoxy - 2 -O - sulfo - alpha - L - threo - hex - 4 -enopyrano - syluronic acid) - D -  
145   glucose
- 146       • delta DiHS - triS Heparan delta Di - tri (U, 6, N) S:
- 147   2 - deoxy - 2 - sulfamino - (4 - deoxy - 2 - O - sulfo - alpha - L - threo - hex - 4 -enopyranoslyuronic acid) - 6 - O -  
148   sulfo - D - glucose
- 149
- 150

151 **Supplementary Videos**

152 **Videos 1-1:** Spontaneous calcium activity in 3D cultures of differentiating human neural stem cells at 7 months;  
153 cells from a fetal ECM containing construct. Recorded at 20 frames per sec (fps), video shown at 50fps for 500  
154 frames.

155 **Videos 1-2:** Spontaneous calcium activity in 3D cultures of differentiating human neural stem cells at 7 months;  
156 cells from an adult ECM containing construct. Recorded at 20 frames per sec (fps), video shown at 50fps for 500  
157 frames.

158 **Videos 1-3:** Spontaneous calcium activity in 3D cultures of differentiating human neural stem cells at 7 months;  
159 cells from an unsupplemented construct. Recorded at 20 frames per sec (fps), video shown at 50fps for 500  
160 frames.

161 **Videos 1-4:** Spontaneous calcium activity in 3D cultures of differentiating human neural stem cells at 3 months;  
162 cells from a fetal ECM containing construct. Recorded at 20 frames per sec (fps), video shown at 50fps for 500  
163 frames.

164 **Videos 1-5:** Spontaneous calcium activity in 3D cultures of differentiating human neural stem cells at 3 months;  
165 cells from an adult ECM containing construct. Recorded at 20 frames per sec (fps), video shown at 50fps for 500  
166 frames.

167 **Videos 1-6:** Spontaneous calcium activity in 3D cultures of differentiating human neural stem cells at 3 months;  
168 cells from an unsupplemented construct. Recorded at 20 frames per sec (fps), video shown at 50fps for 500  
169 frames.

170 **Supplementary Table 1:** List of genes tested for release in 3D differentiating human neural stem cell cultures.

|         |                                                                   |
|---------|-------------------------------------------------------------------|
| CACNA1D | Voltage-dependent L-type calcium channel subunit alpha-1D         |
| CAMK2G  | Calcium/calmodulin-dependent protein kinase type II subunit gamma |
| DLG4    | Disks large homolog 4                                             |
| EAAT1   | Excitatory amino acid transporter 1                               |
| EAAT2   | Excitatory amino acid transporter 2                               |

|          |                                                          |
|----------|----------------------------------------------------------|
| ENO1     | Enolase 1                                                |
| FABP7    | Fatty Acid Binding Protein 7                             |
| GABBR1   | Gamma-aminobutyric acid type B receptor subunit 1        |
| GAD1     | Glutamate decarboxylase 1                                |
| GFAP     | Glial fibrillary acidic protein                          |
| GPHN     | Gephyrin                                                 |
| GRIA1    | Glutamate receptor 1                                     |
| GRIN1    | Glutamate receptor ionotropic, NMDA 1                    |
| KCNB1    | Potassium voltage-gated channel subfamily B member 1     |
| KCND2    | Potassium voltage-gated channel subfamily D member 2     |
| MAP2     | Microtubule associated protein 2                         |
| MEGF10   | Multiple epidermal growth factor-like domains protein 10 |
| NCS1     | Neuronal calcium sensor 1                                |
| NES      | Nestin                                                   |
| PAX6     | Paired box protein Pax-6                                 |
| SCN1A    | Sodium channel protein type 1 subunit alpha              |
| SCN3A    | Sodium channel protein type 3 subunit alpha              |
| SERPINA3 | Peptidase inhibitor Serpina3n                            |
| SOX2     | Transcription factor SOX-2                               |
| Stat3    | Signal transducer and activator of transcription 3       |
| SYN1     | Synapsin 1                                               |
| THBS1    | Thrombospondin 1                                         |
| THBS2    | Thrombospondin 2                                         |
| TNC      | Tenascin                                                 |
| TUBB3    | Beta-III tubulin                                         |

171

172 **Supplementary Table 2:** List of cytokines tested for release in 3D differentiating human neural stem cell cultures

|              |                                                  |
|--------------|--------------------------------------------------|
| ACRP30       | Adiponectin                                      |
| BDNF         | Brain-derived neurotrophic factor                |
| BMP2         | Bone morphogenetic protein 2                     |
| b-NGF        | beta- Nerve growth factor                        |
| bFGF         | Basic fibroblast growth factor                   |
| C5a          | Complement component 5a                          |
| CNTF         | Ciliary neurotrophic factor                      |
| EGF          | Epidermal growth factor                          |
| G-CSF        | Granulocyte-colony stimulating factor            |
| GDNF         | Glial derived neurotrophic factor                |
| GM-CSF       | Granulocyte-macrophage colony-stimulating factor |
| GRO $\alpha$ | Chemokine (C-X-C motif) ligand 1                 |
| ICAM-1       | Intercellular Adhesion Molecule 1                |
| IGF-1        | Insulin growth factor-1                          |
| IL-10        | Interleukin 10                                   |
| IL-1a        | Interleukin 1 alpha                              |
| IL-1b        | Interleukin 1 beta                               |
| IL-1ra       | Interleukin-1 receptor antagonist                |
| IL-6         | Interleukin 6                                    |
| IL-8         | Interleukin 8/Chemokine (C-X-C motif) ligand 8   |
| LIF          | Leukemia inhibitory factor                       |
| MCP-1        | Chemokine ligand 2/CCL2                          |
| MIP-1 beta   | Macrophage Inflammatory Protein-1                |
| MIP-1a       | Chemokine ligand 3/CCL3                          |
| MMP-2        | Matrix metalloproteinase 2                       |
| MMP-9        | Matrix metalloproteinase 9                       |
| NT-3         | Neurotrophin-3                                   |

|            |                                                |
|------------|------------------------------------------------|
| PDGF-AA    | Platelet growth factor                         |
| RANTES     | Chemokine ligand 5/CCL5                        |
| TGF beta 1 | Transforming growth factor beta 1              |
| TIMP-1     | Tissue inhibitor of matrix metalloproteinase 1 |
| TIMP-2     | Tissue inhibitor of matrix metalloproteinase 2 |
| TIMP-4     | Tissue inhibitor of matrix metalloproteinase 4 |
| TNFa       | Tumor necrosis factor alpha                    |
| TSP-1      | Thrombospondin 1                               |
| TSP-2      | Thrombospondin 2                               |
| VEGF-A     | Vascular endothelial growth factor A           |

173

174
